# Supplementary material
Source: Springer Nature journal article supplement (https://springermedizin.de/resource/supplementary/12931_2012_1253_MOESM2_ESM.pdf/9425832)

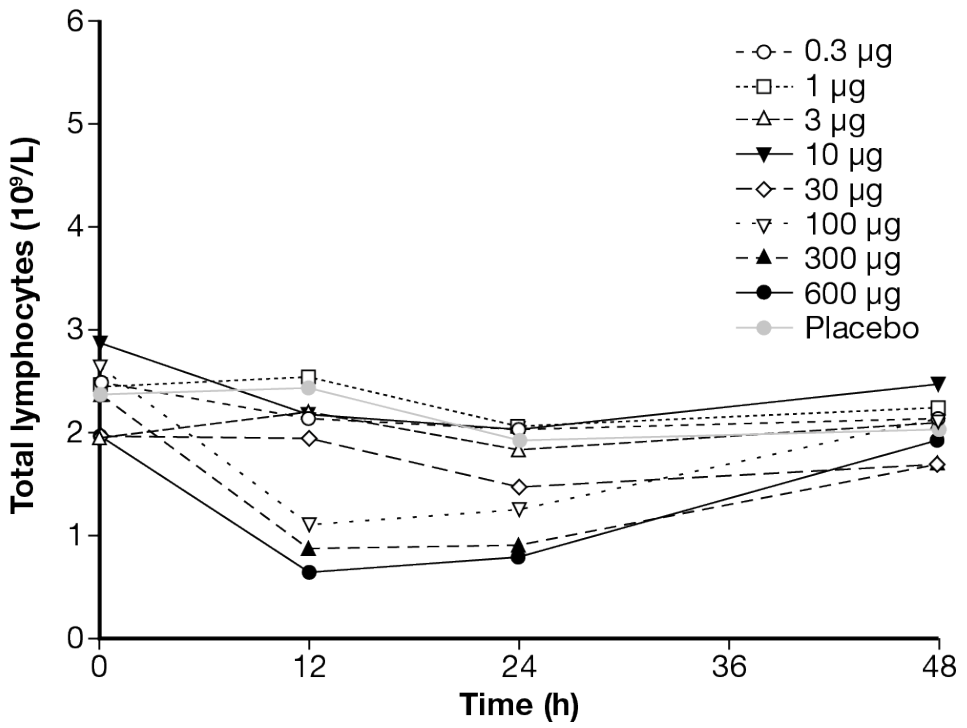

Figure 2B

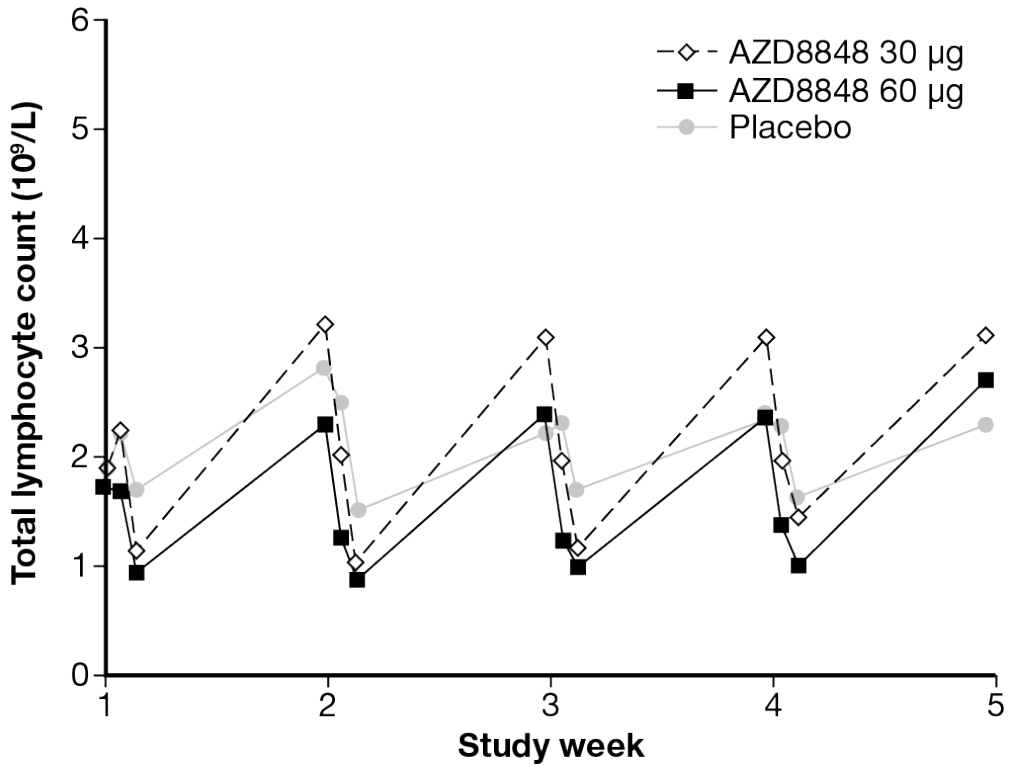

Supplement: MOESM2 [file 9425832]
